# Supplementary material for: Ferroptotic cell death triggered by conjugated linolenic acids is mediated by ACSL1
Source: PubMed Central journal article supplement (PMC8046803; doi:10.1038/s41467-021-22471-y), 2021-04-14
Supplement: 41467_2021_22471_MOESM3_ESM.pdf [file 41467_2021_22471_MOESM3_ESM.pdf]

## **Description of Additional Supplementary Files**

File Name: Supplementary Movie 1

Description: Time-lapse phase contrast microscopy of BT-549 cells treated with 25  $\mu$ M aESA at time 0. Elapsed time in hours:min is given within the frame.

File Name: Supplementary Movie 2

Description: Time-lapse phase contrast microscopy of BT-549 cells treated with 0.5  $\mu$ M ML162 at time 0. Elapsed time in hours:min is given within the frame.

File Name: Supplementary Movie 3

Description: Time-lapse phase contrast microscopy of BT-549 cells treated with 0.5  $\mu$ M staurosporine at time 0. Elapsed time in hours:min is given within the frame

File Name: Supplementary Data 1

Description: Supplementary Table 1. Lipidomic assessment of aESA incorporation into lipids in MDA-MB-231

File Name: Supplementary Data 2

Description: Supplementary Table 2. Lipidome changes associated with ACSL1 deficiency (vehicle-treated), Supplementary Table 3. Lipidome changes associated with ACSL1 deficiency (aESA-treated), Supplementary Table 4. Comparison of lipidome changes associated with ACSL1 deficiency compared to ACSL1 overexpression, and Supplementary Table 5. Alterations in mole percent of 18:3-containing lipids associated with ACSL1 deficiency.

File Name: Supplementary Data 3

Description: Supplementary Table 6. Lipidomic analysis of oxidized triacylglycerols in BT-549 cells.

File Name: Supplementary Data 4

Description: Lipidomic analysis of oxidized triacylglycerols in BT-549 cells
